# Supplementary material for: Nickel-based metal–organic framework-derived Ni/NC/KB as a separator coating for high capacity lithium–sulfur batteries
Source: Royal Society of Chemistry journal article supplement (doi:10.1039/d1se01368h), 2021-01-01
Supplement: d1se01368h1.pdf [file d1se01368h1.pdf]

## Supporting information

### **Nickel-based metal-organic framework-derived Ni/NC/KB as separator coating for lithium-sulfur batteries**

Peisen Wu,<sup>†a</sup> Yongbo Wu,<sup>†b</sup> Kaiyin Zhu<sup>a</sup>, Guozheng Ma<sup>a,\*</sup>, Xiaoming Lin<sup>a,\*</sup>, Akif Zeb<sup>a</sup>, Xinli Chen<sup>a,\*</sup> and Kang Li<sup>a,\*</sup>

<sup>a</sup> *Guangzhou Key Laboratory of Materials for Energy Conversion and Storage, Key Laboratory of Theoretical Chemistry of Environment, Ministry of Education, School of Chemistry, South China Normal University, Guangzhou, 510006, P.R. China*

<sup>b</sup> *South China Normal University, School of Physics and Telecom Engineering, 510006, Guangzhou, China*

<sup>†</sup> These authors contributed equally.

---

\*Authors to whom correspondence should be addressed. E-mail: maguozheng@m.scnu.edu.cn; linxm@scnu.edu.cn, chenxinli@m.scnu.edu.cn, likang5@m.scnu.edu.cn.

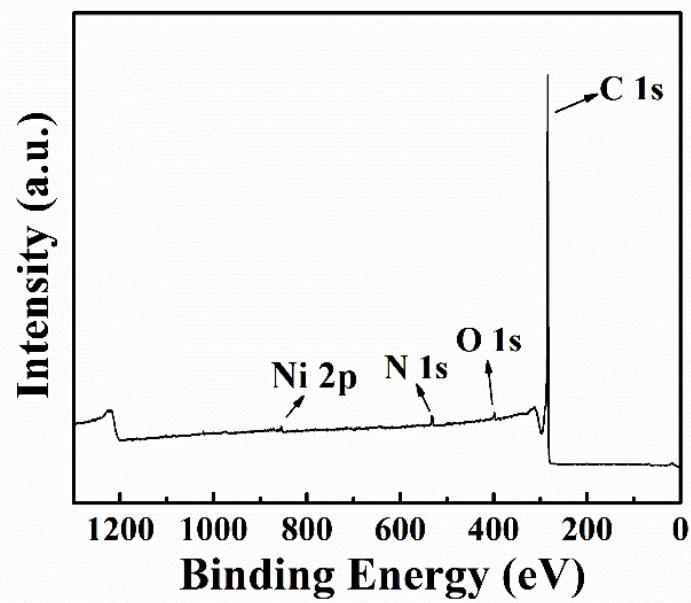

Fig. S1. XPS survey.

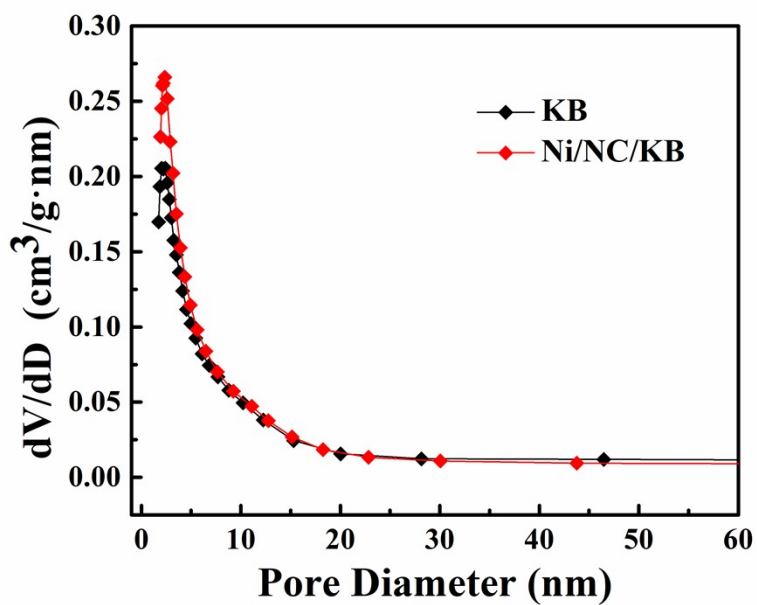

Fig. S2. Pore size distribution of Ni/NC/KB and KB.

Table S1. Comparison of cyclabilities of previous MOFs or MOFs derivatives as separator coating and our reports on Li-S Cells.

| Separator coating                           | Rate   | Cycles | Final capacity<br>(mAh/g) | References |
|---------------------------------------------|--------|--------|---------------------------|------------|
| UiO-66-S/Nafion                             | 0.2 C  | 200    | 872.3                     | S1         |
| Ni <sub>3</sub> (HITP) <sub>2</sub>         | 0.5 C  | 300    | 585.4                     | S2         |
| Y-FTZB                                      | 0.25 C | 300    | 557                       | S3         |
| Co <sub>3</sub> O <sub>4</sub> -350/PI/LLZO | 0.1 C  | 200    | 630                       | S4         |
| B/2D MOF-Co                                 | 0.5 C  | 200    | 703                       | S5         |
| Ni/NC/KB                                    | 1 C    | 500    | 653.7                     | This work  |

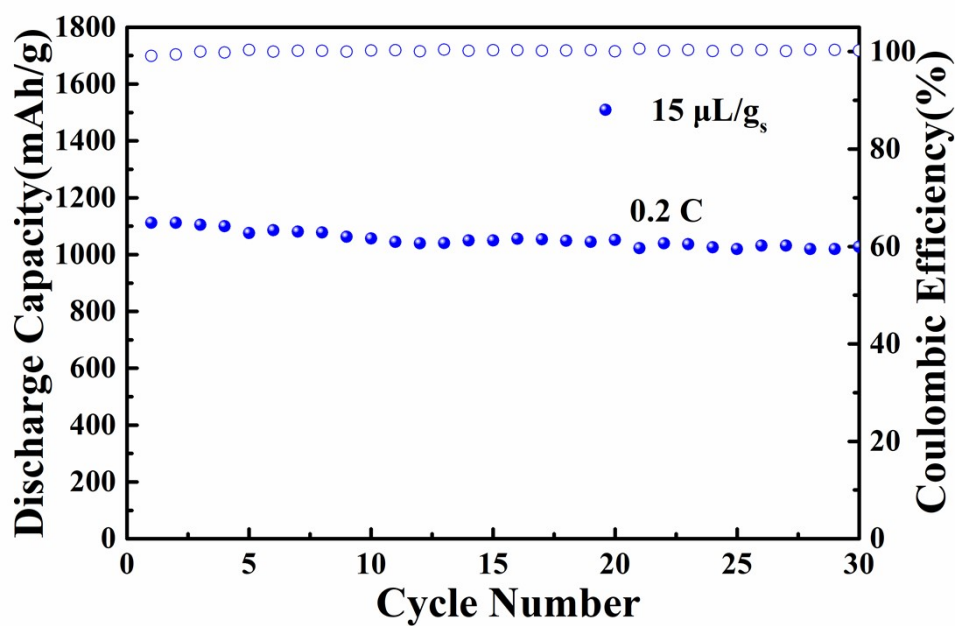

Fig. S3. Cycling performance of Ni/NC/KB separator with 15 μL g<sub>s</sub><sup>-1</sup> at 0.2 C.

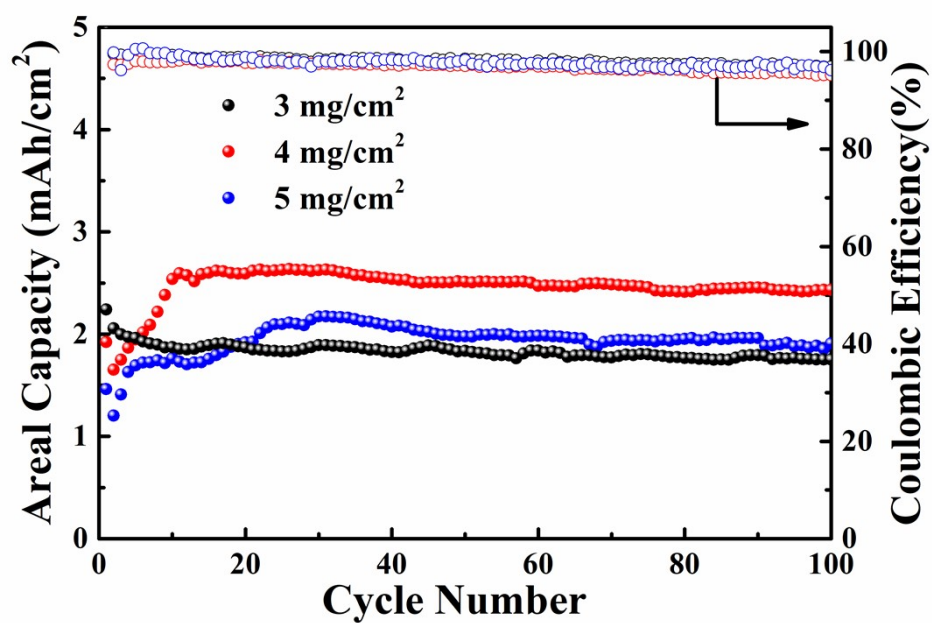

Fig. S4. Areal capacity of Ni/NC/KB separator with different areal sulfur loading at 0.5 C.

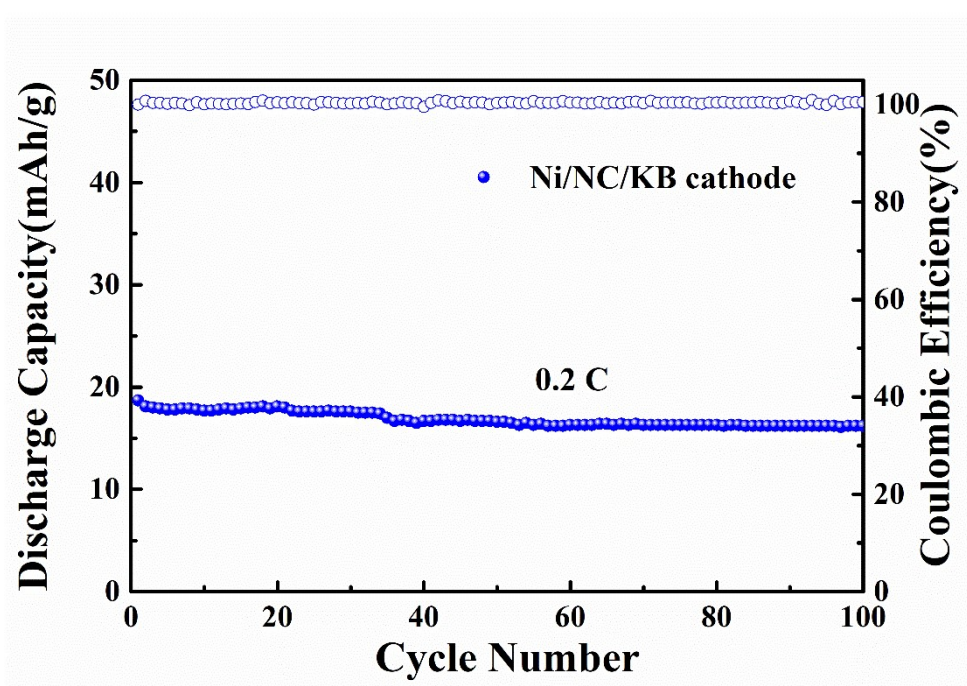

Fig. S5. Cycling performance of Ni/NC/KB cathode at 0.2 C.

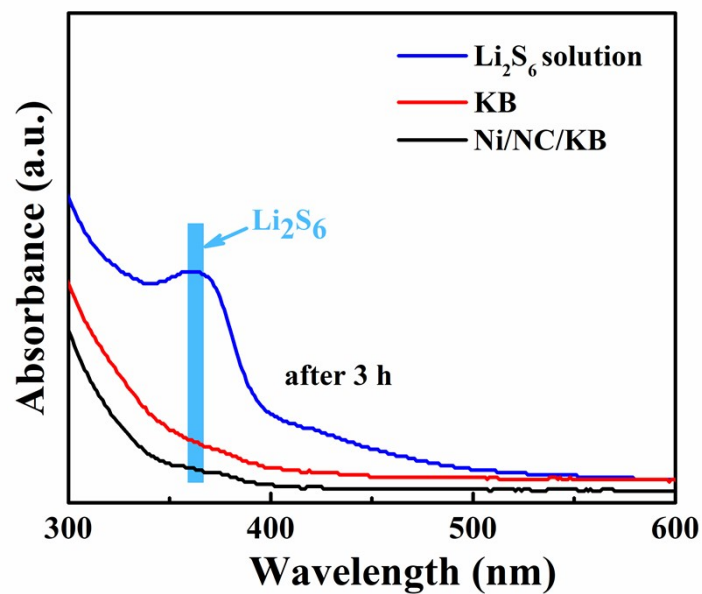

Fig. S6. The UV-vis absorption spectra of Ni/NC/KB, KB and Li<sub>2</sub>S<sub>6</sub> solution after 3 h adsorption.

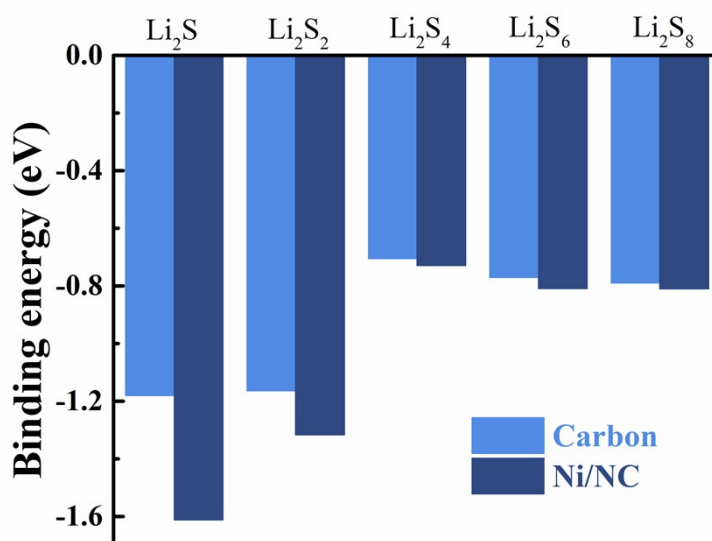

Fig. S7. The binding energy of polysulfides absorbed by carbon and Ni/NC.

## Reference

- S1. S.H. Kim, J.S. Yeon, R. Kim, K.M. Choi, H.S. Park, A functional separator coated with sulfonated metal-organic framework/Nafion hybrids for Li-S batteries, *J Mater Chem A*, 6 (2018) 24971-24978.
- S2. H. Chen, Y. Xiao, C. Chen, J. Yang, C. Gao, Y. Chen, J. Wu, Y. Shen, W. Zhang, S. Li, F. Huo, B. Zheng, Conductive MOF-modified separator for mitigating the shuttle effect of lithium-sulfur battery through a filtration method, *ACS Appl Mater Interfaces*, 11 (2019) 11459-11465.
- S3. M. Li, Y. Wan, J.K. Huang, A.H. Assen, C.E. Hsiung, H. Jiang, Y. Han, M. Eddaoudi, Z. Lai, J. Ming, L.J. Li, Metal-organic framework-based separators for enhancing Li-S battery stability: mechanism of mitigating polysulfide diffusion, *Acs Energy Lett*, 2 (2017) 2362-2367.
- S4. Z. Zhou, Y. Li, T. Fang, Y. Zhao, Q. Wang, J. Zhang, Z. Zhou, MOF-derived  $\text{Co}_3\text{O}_4$  polyhedrons as efficient polysulfides barrier on polyimide separators for high temperature lithium-sulfur batteries, *Nanomaterials*, 9 (2019) 1574.
- S5. Y. Li, S. Lin, D. Wang, T. Gao, J. Song, P. Zhou, Z. Xu, Z. Yang, N. Xiao, S. Guo, Single atom array mimic on ultrathin MOF nanosheets boosts the safety and life of lithium-sulfur batteries, *Adv Mater*, 32 (2020) 1906722.
